# Supplementary material for: Energy Metabolites and Indicative Significance of α-Ketoglutarate and α-Ketoglutaramate in Assessing the Progression of Chronic Hepatoencephalopathy
Source: MDPI journal article supplement (doi:10.3390/biom14020217), 2024-02-12
Supplement: s1 [file s1]

Type of the Paper: Article

# Energy Metabolites and Indicative Significance of $\alpha$ -Ketoglutarate and $\alpha$ -Ketoglutamamate in Assessing the Progression of Chronic Hepatoencephalopathy

Yevgeniya I. Shurubor<sup>1,\*</sup>, Andrey B. Krasnikov<sup>2</sup>, Elena P. Isakova<sup>3</sup>, Yulia I. Deryabina<sup>3</sup>, Vladimir S. Yudin<sup>1</sup>, Anton A. Keskinov<sup>1</sup>, Boris F. Krasnikov<sup>1,4,\*</sup>

<sup>1</sup> Centre for Strategic Planning of FMBA of Russia, Pogodinskaya St., Bld.10, 119121 Moscow, Russia; EShurubor@cspmba.ru (Y.I.S.); VYudin@cspmba.ru (V.S.Y.); Keskinov@cspmba.ru (A.A.K.); BKrasnikov@cspmba.ru (B.F.K.)

<sup>2</sup> Independent Researcher, 24 Ivana Babushkina St., 117292 Moscow, Russia; kr-ab@yandex.ru (A.B.K.)

<sup>3</sup> Bach Institute of Biochemistry, Research Center of Biotechnology of the Russian Academy of Sciences, Moscow 119071, Russia; elen\_iss@mail.ru (E.P.I.); yul\_der@mail.ru (Y.I.D.)

<sup>4</sup> Department of Biochemistry and Molecular Biology, Faculty of Medicine, N.I. Pirogov Russian National Research Medical University, 1 Ostrovitianova Str., Moscow 117997, Russia; (B.F.K.)

\* Correspondence: EShurubor@cspmba.ru (Y.I.S.) BKrasnikov@cspmba.ru (B.F.K.)

## SUPPLEMENTARY MATERIALS

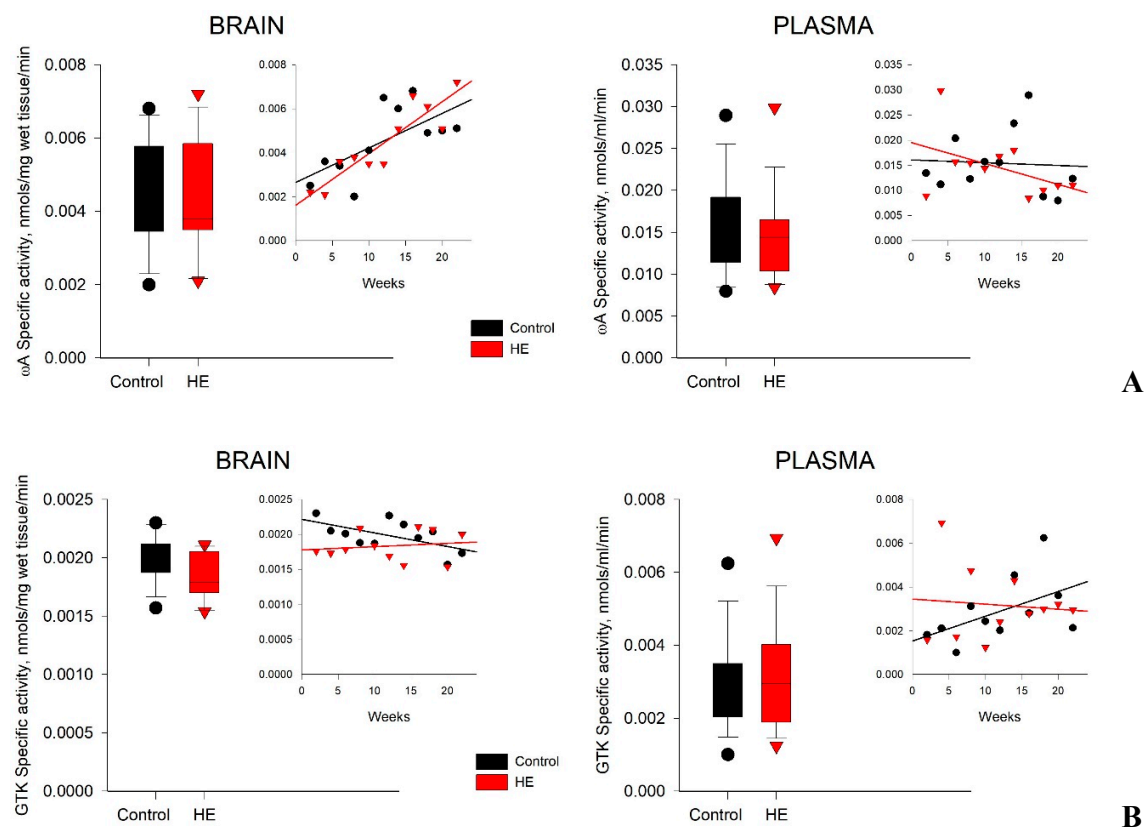

**Figure S1.** Specific activity of  $\omega$ A (A) and GTK (B) in brain tissues and blood plasma of control (black circle) and TAA-induced groups of rats (red triangle). The data are presented as average values (for the period of 2-22 weeks).

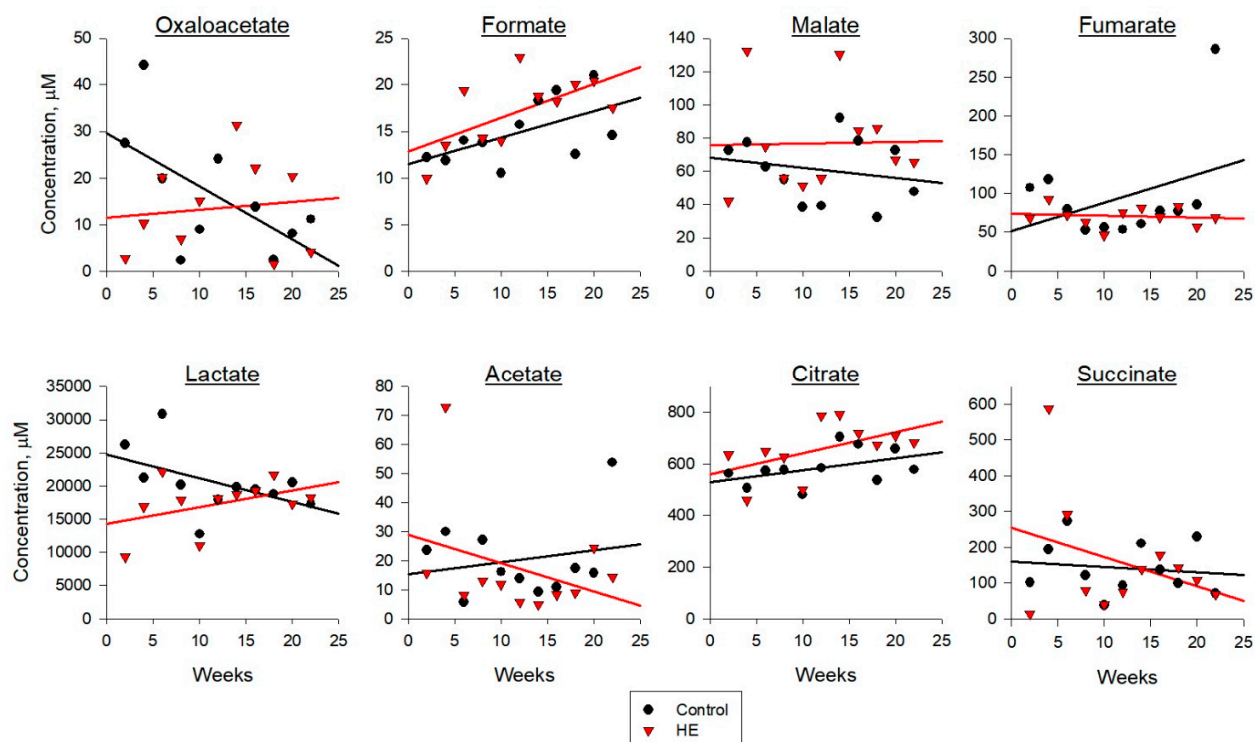

**Figure S2.** Distribution of the pool of TCA metabolites in the blood plasma of control (black circle) and TAA-induced groups of rats (red triangle). The data are presented as average values (for the period of 2-22 weeks).

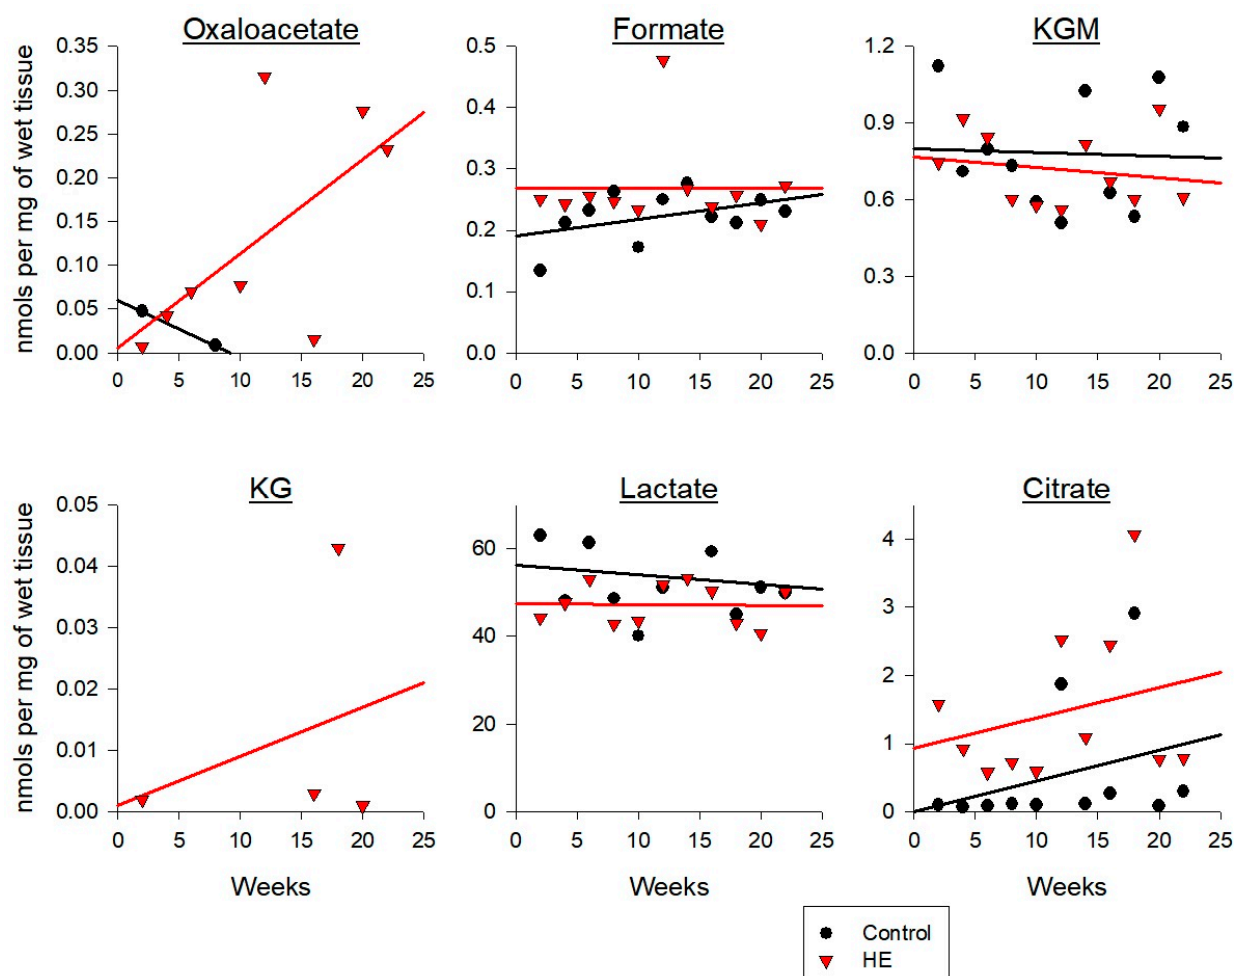

**Figure S3.** Distribution of the pool of TCA metabolites in the liver of control (black circle) and TAA-induced groups of rats (red triangle). The data are presented as average values (for the period of 2-22 weeks).

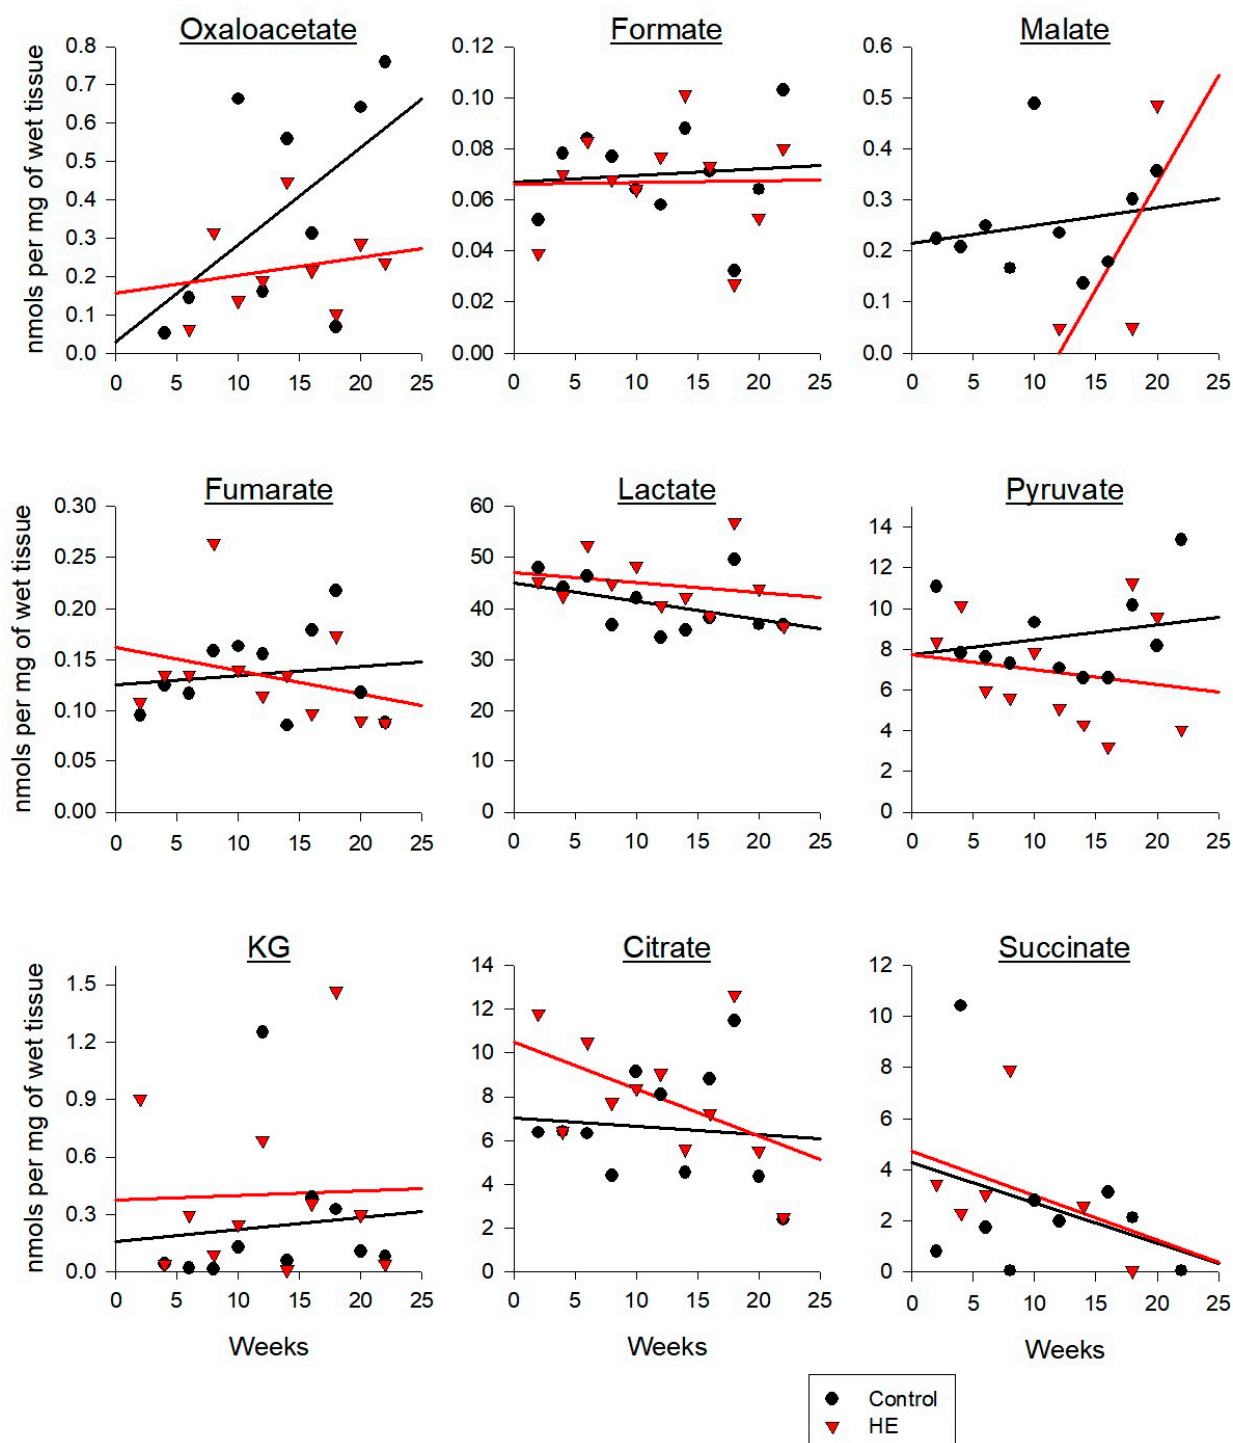

**Figure S4.** Distribution of the pool of TCA metabolites in the kidneys of control (black circle) and TAA-induced groups of rats (red triangle). The data are presented as average values (for the period of 2-22 weeks).

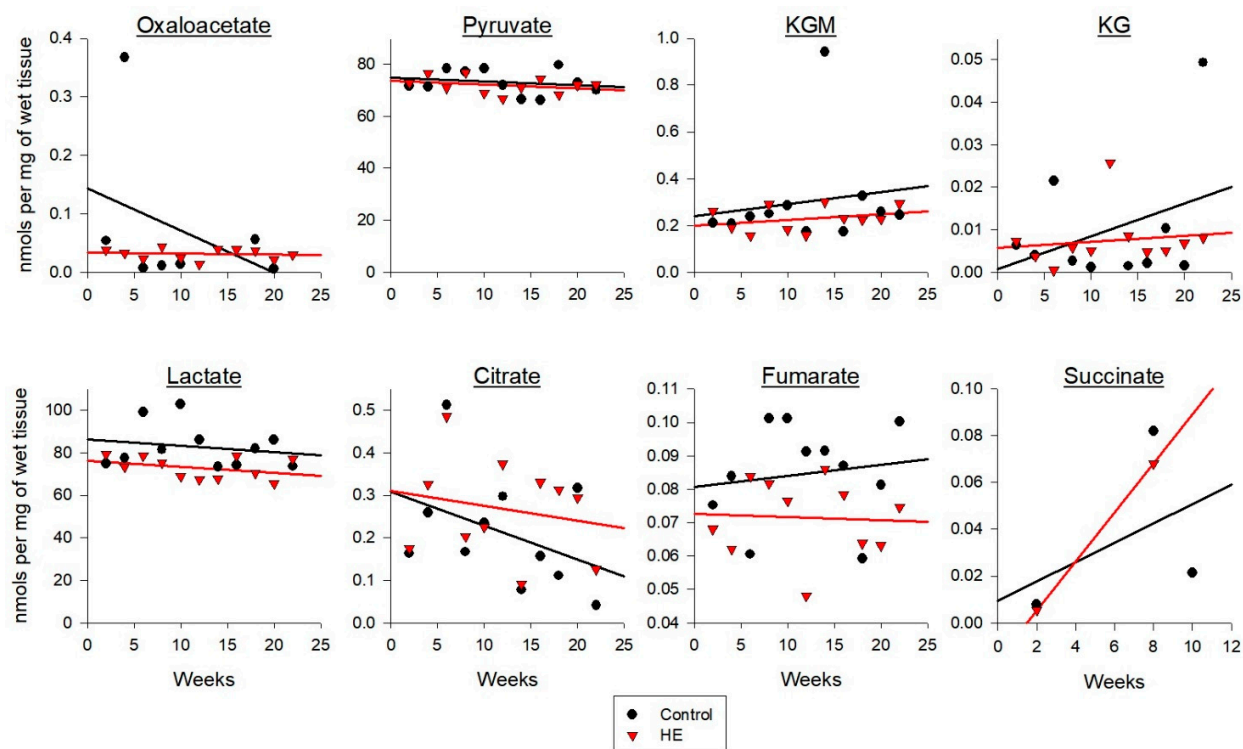

**Figure S5.** Distribution of the pool of TCA metabolites in the brain of control (black circle) and TAA-induced groups of rats (red triangle). The data are presented as average values (for the period of 2-22 weeks).
